# Supplementary material
Source: publisher site journal article supplement (https://www.dovepress.com/article/393415)
Supplement: Supplementary file 1 [file get_supplementary_file.php]

**Statistical analysis- Supplementary file**

**Crosstabs**

| **Notes** | | |
| --- | --- | --- |
| Output Created | | 12-DEC-2022 16:37:23 |
| Comments | |  |
| Input | Active Dataset | DataSet4 |
| Filter | <none> |
| Weight | <none> |
| Split File | <none> |
| N of Rows in Working Data File | 319 |
| Missing Value Handling | Definition of Missing | User-defined missing values are treated as missing. |
| Cases Used | Statistics for each table are based on all the cases with valid data in the specified range(s) for all variables in each table. |
| Syntax | | CROSSTABS  /TABLES=SI DI BY DM  /FORMAT=AVALUE TABLES  /STATISTICS=CHISQ PHI  /CELLS=COUNT EXPECTED  /COUNT ROUND CELL. |
| Resources | Processor Time | 00:00:00.00 |
| Elapsed Time | 00:00:00.00 |
| Dimensions Requested | 2 |
| Cells Available | 524245 |

| **Case Processing Summary** | | | | | | |
| --- | --- | --- | --- | --- | --- | --- |
|  | Cases | | | | | |
| Valid | | Missing | | Total | |
| N | Percent | N | Percent | N | Percent |
| SI * DM | 220 | 69.0% | 99 | 31.0% | 319 | 100.0% |
| DI * DM | 220 | 69.0% | 99 | 31.0% | 319 | 100.0% |

**Skin and soft tissue infection * MRSA patients with and without Diabetes (DM)**

| **Crosstab** | | | | | |
| --- | --- | --- | --- | --- | --- |
|  | | | DM | | Total |
| 0 | 1 |
| SSTIs | 0 | Count | 13 | 21 | 34 |
| Expected Count | 15.1 | 18.9 | 34.0 |
| 1 | Count | 85 | 101 | 186 |
| Expected Count | 82.9 | 103.1 | 186.0 |
| Total | | Count | 98 | 122 | 220 |
| Expected Count | 98.0 | 122.0 | 220.0 |

Note: O=Absent; 1 = present

| **Chi-Square Tests** | | | | | |
| --- | --- | --- | --- | --- | --- |
|  | Value | df | Asymptotic Significance (2-sided) | Exact Sig. (2-sided) | Exact Sig. (1-sided) |
| Pearson Chi-Square | .648a | 1 | .421 |  |  |
| Continuity Correctionb | .381 | 1 | .537 |  |  |
| Likelihood Ratio | .655 | 1 | .418 |  |  |
| Fisher's Exact Test |  |  |  | .458 | .270 |
| Linear-by-Linear Association | .645 | 1 | .422 |  |  |
| N of Valid Cases | 220 |  |  |  |  |
| a. 0 cells (0.0%) have expected count less than 5. The minimum expected count is 15.15. | | | | | |
| b. Computed only for a 2x2 table | | | | | |

| **Symmetric Measures** | | | |
| --- | --- | --- | --- |
|  | | Value | Approximate Significance |
| Nominal by Nominal | Phi | -.054 | .421 |
| Cramer's V | .054 | .421 |
| N of Valid Cases | | 220 |  |

**Deep Infection * DM**

| **Crosstab** | | | | | |
| --- | --- | --- | --- | --- | --- |
|  | | | DM | | Total |
| 0 | 1 |
| DI | 0 | Count | 85 | 101 | 186 |
| Expected Count | 82.9 | 103.1 | 186.0 |
| 1 | Count | 13 | 21 | 34 |
| Expected Count | 15.1 | 18.9 | 34.0 |
| Total | | Count | 98 | 122 | 220 |
| Expected Count | 98.0 | 122.0 | 220.0 |

| **Chi-Square Tests** | | | | | |
| --- | --- | --- | --- | --- | --- |
|  | Value | df | Asymptotic Significance (2-sided) | Exact Sig. (2-sided) | Exact Sig. (1-sided) |
| Pearson Chi-Square | .648a | 1 | .421 |  |  |
| Continuity Correctionb | .381 | 1 | .537 |  |  |
| Likelihood Ratio | .655 | 1 | .418 |  |  |
| Fisher's Exact Test |  |  |  | .458 | .270 |
| Linear-by-Linear Association | .645 | 1 | .422 |  |  |
| N of Valid Cases | 220 |  |  |  |  |
| a. 0 cells (0.0%) have expected count less than 5. The minimum expected count is 15.15. | | | | | |
| b. Computed only for a 2x2 table | | | | | |

| **Symmetric Measures** | | | |
| --- | --- | --- | --- |
|  | | Value | Approximate Significance |
| Nominal by Nominal | Phi | .054 | .421 |
| Cramer's V | .054 | .421 |
| N of Valid Cases | | 220 |  |

**Crosstabs**

| **Notes** | | |
| --- | --- | --- |
| Output Created | | 12-DEC-2022 16:39:42 |
| Comments | |  |
| Input | Active Dataset | DataSet4 |
| Filter | <none> |
| Weight | <none> |
| Split File | <none> |
| N of Rows in Working Data File | 319 |
| Missing Value Handling | Definition of Missing | User-defined missing values are treated as missing. |
| Cases Used | Statistics for each table are based on all the cases with valid data in the specified range(s) for all variables in each table. |
| Syntax | | CROSSTABS  /TABLES=FIFU WI Septicarthritis Ost USI Bacteremia Sepsis NF Gangrene Cellulitis Carb Abscess SSI  COT CIP E TET CD TEI LZ GEN RIF MSB CMLSB IMLB PAPAUC BY DM  /FORMAT=AVALUE TABLES  /STATISTICS=CHISQ PHI  /CELLS=COUNT EXPECTED  /COUNT ROUND CELL. |
| Resources | Processor Time | 00:00:00.05 |
| Elapsed Time | 00:00:00.10 |
| Dimensions Requested | 2 |
| Cells Available | 524245 |

| **Case Processing Summary** | | | | | | |
| --- | --- | --- | --- | --- | --- | --- |
|  | Cases | | | | | |
| Valid | | Missing | | Total | |
| N | Percent | N | Percent | N | Percent |
| FI/FU * DM | 220 | 69.0% | 99 | 31.0% | 319 | 100.0% |
| WI * DM | 220 | 69.0% | 99 | 31.0% | 319 | 100.0% |
| Septic arthritis * DM | 220 | 69.0% | 99 | 31.0% | 319 | 100.0% |
| Ost * DM | 220 | 69.0% | 99 | 31.0% | 319 | 100.0% |
| USI * DM | 220 | 69.0% | 99 | 31.0% | 319 | 100.0% |
| Bacteremia * DM | 220 | 69.0% | 99 | 31.0% | 319 | 100.0% |
| Sepsis * DM | 220 | 69.0% | 99 | 31.0% | 319 | 100.0% |
| NF * DM | 220 | 69.0% | 99 | 31.0% | 319 | 100.0% |
| Gangrene * DM | 220 | 69.0% | 99 | 31.0% | 319 | 100.0% |
| Cellulitis * DM | 220 | 69.0% | 99 | 31.0% | 319 | 100.0% |
| Carb * DM | 220 | 69.0% | 99 | 31.0% | 319 | 100.0% |
| Abscess * DM | 220 | 69.0% | 99 | 31.0% | 319 | 100.0% |
| SSI * DM | 220 | 69.0% | 99 | 31.0% | 319 | 100.0% |
| COT * DM | 220 | 69.0% | 99 | 31.0% | 319 | 100.0% |
| CIP * DM | 220 | 69.0% | 99 | 31.0% | 319 | 100.0% |
| E * DM | 220 | 69.0% | 99 | 31.0% | 319 | 100.0% |
| TET * DM | 220 | 69.0% | 99 | 31.0% | 319 | 100.0% |
| CD * DM | 220 | 69.0% | 99 | 31.0% | 319 | 100.0% |
| TEI * DM | 220 | 69.0% | 99 | 31.0% | 319 | 100.0% |
| LZ * DM | 220 | 69.0% | 99 | 31.0% | 319 | 100.0% |
| GEN * DM | 220 | 69.0% | 99 | 31.0% | 319 | 100.0% |
| RIF * DM | 220 | 69.0% | 99 | 31.0% | 319 | 100.0% |
| MSB * DM | 220 | 69.0% | 99 | 31.0% | 319 | 100.0% |
| CMLSB * DM | 220 | 69.0% | 99 | 31.0% | 319 | 100.0% |
| IMLB * DM | 220 | 69.0% | 99 | 31.0% | 319 | 100.0% |
| PAP-AUC * DM | 220 | 69.0% | 99 | 31.0% | 319 | 100.0% |

**Foot Infection/Foot Ulcer * DM**

| **Crosstab** | | | | | |
| --- | --- | --- | --- | --- | --- |
|  | | | DM | | Total |
| 0 | 1 |
| FI/FU | 0 | Count | 95 | 91 | 186 |
| Expected Count | 82.9 | 103.1 | 186.0 |
| 1 | Count | 3 | 31 | 34 |
| Expected Count | 15.1 | 18.9 | 34.0 |
| Total | | Count | 98 | 122 | 220 |
| Expected Count | 98.0 | 122.0 | 220.0 |

| **Chi-Square Tests** | | | | | |
| --- | --- | --- | --- | --- | --- |
|  | Value | df | Asymptotic Significance (2-sided) | Exact Sig. (2-sided) | Exact Sig. (1-sided) |
| Pearson Chi-Square | 20.774a | 1 | <.001 |  |  |
| Continuity Correctionb | 19.099 | 1 | <.001 |  |  |
| Likelihood Ratio | 24.303 | 1 | <.001 |  |  |
| Fisher's Exact Test |  |  |  | <.001 | <.001 |
| Linear-by-Linear Association | 20.679 | 1 | <.001 |  |  |
| N of Valid Cases | 220 |  |  |  |  |
| a. 0 cells (0.0%) have expected count less than 5. The minimum expected count is 15.15. | | | | | |
| b. Computed only for a 2x2 table | | | | | |

| **Symmetric Measures** | | | |
| --- | --- | --- | --- |
|  | | Value | Approximate Significance |
| Nominal by Nominal | Phi | .307 | <.001 |
| Cramer's V | .307 | <.001 |
| N of Valid Cases | | 220 |  |

**Wound Infection * DM**

| **Crosstab** | | | | | |
| --- | --- | --- | --- | --- | --- |
|  | | | DM | | Total |
| 0 | 1 |
| WI | 0 | Count | 73 | 120 | 193 |
| Expected Count | 86.0 | 107.0 | 193.0 |
| 1 | Count | 25 | 2 | 27 |
| Expected Count | 12.0 | 15.0 | 27.0 |
| Total | | Count | 98 | 122 | 220 |
| Expected Count | 98.0 | 122.0 | 220.0 |

| **Chi-Square Tests** | | | | | |
| --- | --- | --- | --- | --- | --- |
|  | Value | df | Asymptotic Significance (2-sided) | Exact Sig. (2-sided) | Exact Sig. (1-sided) |
| Pearson Chi-Square | 28.762a | 1 | <.001 |  |  |
| Continuity Correctionb | 26.588 | 1 | <.001 |  |  |
| Likelihood Ratio | 32.109 | 1 | <.001 |  |  |
| Fisher's Exact Test |  |  |  | <.001 | <.001 |
| Linear-by-Linear Association | 28.632 | 1 | <.001 |  |  |
| N of Valid Cases | 220 |  |  |  |  |
| a. 0 cells (0.0%) have expected count less than 5. The minimum expected count is 12.03. | | | | | |
| b. Computed only for a 2x2 table | | | | | |

| **Symmetric Measures** | | | |
| --- | --- | --- | --- |
|  | | Value | Approximate Significance |
| Nominal by Nominal | Phi | -.362 | <.001 |
| Cramer's V | .362 | <.001 |
| N of Valid Cases | | 220 |  |

**Septic arthritis * DM**

| **Crosstab** | | | | | |
| --- | --- | --- | --- | --- | --- |
|  | | | DM | | Total |
| 0 | 1 |
| Septic arthritis | 0 | Count | 97 | 121 | 218 |
| Expected Count | 97.1 | 120.9 | 218.0 |
| 1 | Count | 1 | 1 | 2 |
| Expected Count | .9 | 1.1 | 2.0 |
| Total | | Count | 98 | 122 | 220 |
| Expected Count | 98.0 | 122.0 | 220.0 |

| **Chi-Square Tests** | | | | | |
| --- | --- | --- | --- | --- | --- |
|  | Value | df | Asymptotic Significance (2-sided) | Exact Sig. (2-sided) | Exact Sig. (1-sided) |
| Pearson Chi-Square | .024a | 1 | .876 |  |  |
| Continuity Correctionb | .000 | 1 | 1.000 |  |  |
| Likelihood Ratio | .024 | 1 | .876 |  |  |
| Fisher's Exact Test |  |  |  | 1.000 | .694 |
| Linear-by-Linear Association | .024 | 1 | .876 |  |  |
| N of Valid Cases | 220 |  |  |  |  |
| a. 2 cells (50.0%) have expected count less than 5. The minimum expected count is .89. | | | | | |
| b. Computed only for a 2x2 table | | | | | |

| **Symmetric Measures** | | | |
| --- | --- | --- | --- |
|  | | Value | Approximate Significance |
| Nominal by Nominal | Phi | -.011 | .876 |
| Cramer's V | .011 | .876 |
| N of Valid Cases | | 220 |  |

**Osteomyelitis * DM**

| **Crosstab** | | | | | |
| --- | --- | --- | --- | --- | --- |
|  | | | DM | | Total |
| 0 | 1 |
| Ost | 0 | Count | 98 | 116 | 214 |
| Expected Count | 95.3 | 118.7 | 214.0 |
| 1 | Count | 0 | 6 | 6 |
| Expected Count | 2.7 | 3.3 | 6.0 |
| Total | | Count | 98 | 122 | 220 |
| Expected Count | 98.0 | 122.0 | 220.0 |

| **Chi-Square Tests** | | | | | |
| --- | --- | --- | --- | --- | --- |
|  | Value | df | Asymptotic Significance (2-sided) | Exact Sig. (2-sided) | Exact Sig. (1-sided) |
| Pearson Chi-Square | 4.955a | 1 | .026 |  |  |
| Continuity Correctionb | 3.274 | 1 | .070 |  |  |
| Likelihood Ratio | 7.210 | 1 | .007 |  |  |
| Fisher's Exact Test |  |  |  | .035 | .027 |
| Linear-by-Linear Association | 4.932 | 1 | .026 |  |  |
| N of Valid Cases | 220 |  |  |  |  |
| a. 2 cells (50.0%) have expected count less than 5. The minimum expected count is 2.67. | | | | | |
| b. Computed only for a 2x2 table | | | | | |

| **Symmetric Measures** | | | |
| --- | --- | --- | --- |
|  | | Value | Approximate Significance |
| Nominal by Nominal | Phi | .150 | .026 |
| Cramer's V | .150 | .026 |
| N of Valid Cases | | 220 |  |

**Umbilical site infection * DM**

| **Crosstab** | | | | | |
| --- | --- | --- | --- | --- | --- |
|  | | | DM | | Total |
| 0 | 1 |
| USI | 0 | Count | 96 | 122 | 218 |
| Expected Count | 97.1 | 120.9 | 218.0 |
| 1 | Count | 2 | 0 | 2 |
| Expected Count | .9 | 1.1 | 2.0 |
| Total | | Count | 98 | 122 | 220 |
| Expected Count | 98.0 | 122.0 | 220.0 |

| **Chi-Square Tests** | | | | | |
| --- | --- | --- | --- | --- | --- |
|  | Value | df | Asymptotic Significance (2-sided) | Exact Sig. (2-sided) | Exact Sig. (1-sided) |
| Pearson Chi-Square | 2.513a | 1 | .113 |  |  |
| Continuity Correctionb | .758 | 1 | .384 |  |  |
| Likelihood Ratio | 3.257 | 1 | .071 |  |  |
| Fisher's Exact Test |  |  |  | .197 | .197 |
| Linear-by-Linear Association | 2.501 | 1 | .114 |  |  |
| N of Valid Cases | 220 |  |  |  |  |
| a. 2 cells (50.0%) have expected count less than 5. The minimum expected count is .89. | | | | | |
| b. Computed only for a 2x2 table | | | | | |

| **Symmetric Measures** | | | |
| --- | --- | --- | --- |
|  | | Value | Approximate Significance |
| Nominal by Nominal | Phi | -.107 | .113 |
| Cramer's V | .107 | .113 |
| N of Valid Cases | | 220 |  |

**Bacteremia * DM**

| **Crosstab** | | | | | |
| --- | --- | --- | --- | --- | --- |
|  | | | DM | | Total |
| 0 | 1 |
| Bacteremia | 0 | Count | 87 | 108 | 195 |
| Expected Count | 86.9 | 108.1 | 195.0 |
| 1 | Count | 11 | 14 | 25 |
| Expected Count | 11.1 | 13.9 | 25.0 |
| Total | | Count | 98 | 122 | 220 |
| Expected Count | 98.0 | 122.0 | 220.0 |

| **Chi-Square Tests** | | | | | |
| --- | --- | --- | --- | --- | --- |
|  | Value | df | Asymptotic Significance (2-sided) | Exact Sig. (2-sided) | Exact Sig. (1-sided) |
| Pearson Chi-Square | .003a | 1 | .954 |  |  |
| Continuity Correctionb | .000 | 1 | 1.000 |  |  |
| Likelihood Ratio | .003 | 1 | .954 |  |  |
| Fisher's Exact Test |  |  |  | 1.000 | .564 |
| Linear-by-Linear Association | .003 | 1 | .954 |  |  |
| N of Valid Cases | 220 |  |  |  |  |
| a. 0 cells (0.0%) have expected count less than 5. The minimum expected count is 11.14. | | | | | |
| b. Computed only for a 2x2 table | | | | | |

| **Symmetric Measures** | | | |
| --- | --- | --- | --- |
|  | | Value | Approximate Significance |
| Nominal by Nominal | Phi | .004 | .954 |
| Cramer's V | .004 | .954 |
| N of Valid Cases | | 220 |  |

**Sepsis * DM**

| **Crosstab** | | | | | |
| --- | --- | --- | --- | --- | --- |
|  | | | DM | | Total |
| 0 | 1 |
| Sepsis | 0 | Count | 97 | 122 | 219 |
| Expected Count | 97.6 | 121.4 | 219.0 |
| 1 | Count | 1 | 0 | 1 |
| Expected Count | .4 | .6 | 1.0 |
| Total | | Count | 98 | 122 | 220 |
| Expected Count | 98.0 | 122.0 | 220.0 |

| **Chi-Square Tests** | | | | | |
| --- | --- | --- | --- | --- | --- |
|  | Value | df | Asymptotic Significance (2-sided) | Exact Sig. (2-sided) | Exact Sig. (1-sided) |
| Pearson Chi-Square | 1.251a | 1 | .263 |  |  |
| Continuity Correctionb | .012 | 1 | .912 |  |  |
| Likelihood Ratio | 1.623 | 1 | .203 |  |  |
| Fisher's Exact Test |  |  |  | .445 | .445 |
| Linear-by-Linear Association | 1.245 | 1 | .265 |  |  |
| N of Valid Cases | 220 |  |  |  |  |
| a. 2 cells (50.0%) have expected count less than 5. The minimum expected count is .45. | | | | | |
| b. Computed only for a 2x2 table | | | | | |

| **Symmetric Measures** | | | |
| --- | --- | --- | --- |
|  | | Value | Approximate Significance |
| Nominal by Nominal | Phi | -.075 | .263 |
| Cramer's V | .075 | .263 |
| N of Valid Cases | | 220 |  |

**Necrotising Fasciitis * DM**

| **Crosstab** | | | | | |
| --- | --- | --- | --- | --- | --- |
|  | | | DM | | Total |
| 0 | 1 |
| NF | 0 | Count | 98 | 120 | 218 |
| Expected Count | 97.1 | 120.9 | 218.0 |
| 1 | Count | 0 | 2 | 2 |
| Expected Count | .9 | 1.1 | 2.0 |
| Total | | Count | 98 | 122 | 220 |
| Expected Count | 98.0 | 122.0 | 220.0 |

| **Chi-Square Tests** | | | | | |
| --- | --- | --- | --- | --- | --- |
|  | Value | df | Asymptotic Significance (2-sided) | Exact Sig. (2-sided) | Exact Sig. (1-sided) |
| Pearson Chi-Square | 1.621a | 1 | .203 |  |  |
| Continuity Correctionb | .312 | 1 | .576 |  |  |
| Likelihood Ratio | 2.373 | 1 | .123 |  |  |
| Fisher's Exact Test |  |  |  | .504 | .306 |
| Linear-by-Linear Association | 1.614 | 1 | .204 |  |  |
| N of Valid Cases | 220 |  |  |  |  |
| a. 2 cells (50.0%) have expected count less than 5. The minimum expected count is .89. | | | | | |
| b. Computed only for a 2x2 table | | | | | |

| **Symmetric Measures** | | | |
| --- | --- | --- | --- |
|  | | Value | Approximate Significance |
| Nominal by Nominal | Phi | .086 | .203 |
| Cramer's V | .086 | .203 |
| N of Valid Cases | | 220 |  |

**Gangrene * DM**

| **Crosstab** | | | | | |
| --- | --- | --- | --- | --- | --- |
|  | | | DM | | Total |
| 0 | 1 |
| Gangrene | 0 | Count | 97 | 120 | 217 |
| Expected Count | 96.7 | 120.3 | 217.0 |
| 1 | Count | 1 | 2 | 3 |
| Expected Count | 1.3 | 1.7 | 3.0 |
| Total | | Count | 98 | 122 | 220 |
| Expected Count | 98.0 | 122.0 | 220.0 |

| **Chi-Square Tests** | | | | | |
| --- | --- | --- | --- | --- | --- |
|  | Value | df | Asymptotic Significance (2-sided) | Exact Sig. (2-sided) | Exact Sig. (1-sided) |
| Pearson Chi-Square | .155a | 1 | .694 |  |  |
| Continuity Correctionb | .000 | 1 | 1.000 |  |  |
| Likelihood Ratio | .159 | 1 | .690 |  |  |
| Fisher's Exact Test |  |  |  | 1.000 | .582 |
| Linear-by-Linear Association | .154 | 1 | .695 |  |  |
| N of Valid Cases | 220 |  |  |  |  |
| a. 2 cells (50.0%) have expected count less than 5. The minimum expected count is 1.34. | | | | | |
| b. Computed only for a 2x2 table | | | | | |

| **Symmetric Measures** | | | |
| --- | --- | --- | --- |
|  | | Value | Approximate Significance |
| Nominal by Nominal | Phi | .027 | .694 |
| Cramer's V | .027 | .694 |
| N of Valid Cases | | 220 |  |

**Cellulitis * DM**

| **Crosstab** | | | | | |
| --- | --- | --- | --- | --- | --- |
|  | | | DM | | Total |
| 0 | 1 |
| Cellulitis | 0 | Count | 96 | 118 | 214 |
| Expected Count | 95.3 | 118.7 | 214.0 |
| 1 | Count | 2 | 4 | 6 |
| Expected Count | 2.7 | 3.3 | 6.0 |
| Total | | Count | 98 | 122 | 220 |
| Expected Count | 98.0 | 122.0 | 220.0 |

| **Chi-Square Tests** | | | | | |
| --- | --- | --- | --- | --- | --- |
|  | Value | df | Asymptotic Significance (2-sided) | Exact Sig. (2-sided) | Exact Sig. (1-sided) |
| Pearson Chi-Square | .314a | 1 | .575 |  |  |
| Continuity Correctionb | .021 | 1 | .886 |  |  |
| Likelihood Ratio | .322 | 1 | .570 |  |  |
| Fisher's Exact Test |  |  |  | .695 | .450 |
| Linear-by-Linear Association | .312 | 1 | .576 |  |  |
| N of Valid Cases | 220 |  |  |  |  |
| a. 2 cells (50.0%) have expected count less than 5. The minimum expected count is 2.67. | | | | | |
| b. Computed only for a 2x2 table | | | | | |

| **Symmetric Measures** | | | |
| --- | --- | --- | --- |
|  | | Value | Approximate Significance |
| Nominal by Nominal | Phi | .038 | .575 |
| Cramer's V | .038 | .575 |
| N of Valid Cases | | 220 |  |

**Carbuncle * DM**

| **Crosstab** | | | | | |
| --- | --- | --- | --- | --- | --- |
|  | | | DM | | Total |
| 0 | 1 |
| Carb | 0 | Count | 97 | 118 | 215 |
| Expected Count | 95.8 | 119.2 | 215.0 |
| 1 | Count | 1 | 4 | 5 |
| Expected Count | 2.2 | 2.8 | 5.0 |
| Total | | Count | 98 | 122 | 220 |
| Expected Count | 98.0 | 122.0 | 220.0 |

| **Chi-Square Tests** | | | | | |
| --- | --- | --- | --- | --- | --- |
|  | Value | df | Asymptotic Significance (2-sided) | Exact Sig. (2-sided) | Exact Sig. (1-sided) |
| Pearson Chi-Square | 1.248a | 1 | .264 |  |  |
| Continuity Correctionb | .438 | 1 | .508 |  |  |
| Likelihood Ratio | 1.358 | 1 | .244 |  |  |
| Fisher's Exact Test |  |  |  | .384 | .260 |
| Linear-by-Linear Association | 1.242 | 1 | .265 |  |  |
| N of Valid Cases | 220 |  |  |  |  |
| a. 2 cells (50.0%) have expected count less than 5. The minimum expected count is 2.23. | | | | | |
| b. Computed only for a 2x2 table | | | | | |

| **Symmetric Measures** | | | |
| --- | --- | --- | --- |
|  | | Value | Approximate Significance |
| Nominal by Nominal | Phi | .075 | .264 |
| Cramer's V | .075 | .264 |
| N of Valid Cases | | 220 |  |

**Abscess * DM**

| **Crosstab** | | | | | |
| --- | --- | --- | --- | --- | --- |
|  | | | DM | | Total |
| 0 | 1 |
| Abscess | 0 | Count | 88 | 114 | 202 |
| Expected Count | 90.0 | 112.0 | 202.0 |
| 1 | Count | 10 | 8 | 18 |
| Expected Count | 8.0 | 10.0 | 18.0 |
| Total | | Count | 98 | 122 | 220 |
| Expected Count | 98.0 | 122.0 | 220.0 |

| **Chi-Square Tests** | | | | | |
| --- | --- | --- | --- | --- | --- |
|  | Value | df | Asymptotic Significance (2-sided) | Exact Sig. (2-sided) | Exact Sig. (1-sided) |
| Pearson Chi-Square | .962a | 1 | .327 |  |  |
| Continuity Correctionb | .538 | 1 | .463 |  |  |
| Likelihood Ratio | .955 | 1 | .328 |  |  |
| Fisher's Exact Test |  |  |  | .336 | .231 |
| Linear-by-Linear Association | .958 | 1 | .328 |  |  |
| N of Valid Cases | 220 |  |  |  |  |
| a. 0 cells (0.0%) have expected count less than 5. The minimum expected count is 8.02. | | | | | |
| b. Computed only for a 2x2 table | | | | | |

| **Symmetric Measures** | | | |
| --- | --- | --- | --- |
|  | | Value | Approximate Significance |
| Nominal by Nominal | Phi | -.066 | .327 |
| Cramer's V | .066 | .327 |
| N of Valid Cases | | 220 |  |

**Surgical Site Infection * DM**

| **Crosstab** | | | | | |
| --- | --- | --- | --- | --- | --- |
|  | | | DM | | Total |
| 0 | 1 |
| SSI | 0 | Count | 59 | 74 | 133 |
| Expected Count | 59.2 | 73.8 | 133.0 |
| 1 | Count | 39 | 48 | 87 |
| Expected Count | 38.8 | 48.2 | 87.0 |
| Total | | Count | 98 | 122 | 220 |
| Expected Count | 98.0 | 122.0 | 220.0 |

| **Chi-Square Tests** | | | | | |
| --- | --- | --- | --- | --- | --- |
|  | Value | df | Asymptotic Significance (2-sided) | Exact Sig. (2-sided) | Exact Sig. (1-sided) |
| Pearson Chi-Square | .005a | 1 | .946 |  |  |
| Continuity Correctionb | .000 | 1 | 1.000 |  |  |
| Likelihood Ratio | .005 | 1 | .946 |  |  |
| Fisher's Exact Test |  |  |  | 1.000 | .528 |
| Linear-by-Linear Association | .005 | 1 | .946 |  |  |
| N of Valid Cases | 220 |  |  |  |  |
| a. 0 cells (0.0%) have expected count less than 5. The minimum expected count is 38.75. | | | | | |
| b. Computed only for a 2x2 table | | | | | |

| **Symmetric Measures** | | | |
| --- | --- | --- | --- |
|  | | Value | Approximate Significance |
| Nominal by Nominal | Phi | -.005 | .946 |
| Cramer's V | .005 | .946 |
| N of Valid Cases | | 220 |  |

**COT * DM**

| **Crosstab** | | | | | |
| --- | --- | --- | --- | --- | --- |
|  | | | DM | | Total |
| 0 | 1 |
| COT | R | Count | 43 | 62 | 105 |
| Expected Count | 46.8 | 58.2 | 105.0 |
| S | Count | 55 | 60 | 115 |
| Expected Count | 51.2 | 63.8 | 115.0 |
| Total | | Count | 98 | 122 | 220 |
| Expected Count | 98.0 | 122.0 | 220.0 |

| **Chi-Square Tests** | | | | | |
| --- | --- | --- | --- | --- | --- |
|  | Value | df | Asymptotic Significance (2-sided) | Exact Sig. (2-sided) | Exact Sig. (1-sided) |
| Pearson Chi-Square | 1.050a | 1 | .306 |  |  |
| Continuity Correctionb | .790 | 1 | .374 |  |  |
| Likelihood Ratio | 1.051 | 1 | .305 |  |  |
| Fisher's Exact Test |  |  |  | .343 | .187 |
| N of Valid Cases | 220 |  |  |  |  |
| a. 0 cells (0.0%) have expected count less than 5. The minimum expected count is 46.77. | | | | | |
| b. Computed only for a 2x2 table | | | | | |

| **Symmetric Measures** | | | |
| --- | --- | --- | --- |
|  | | Value | Approximate Significance |
| Nominal by Nominal | Phi | -.069 | .306 |
| Cramer's V | .069 | .306 |
| N of Valid Cases | | 220 |  |

**CIP * DM**

| **Crosstab** | | | | | |
| --- | --- | --- | --- | --- | --- |
|  | | | DM | | Total |
| 0 | 1 |
| CIP | R | Count | 83 | 110 | 193 |
| Expected Count | 86.0 | 107.0 | 193.0 |
| S | Count | 15 | 12 | 27 |
| Expected Count | 12.0 | 15.0 | 27.0 |
| Total | | Count | 98 | 122 | 220 |
| Expected Count | 98.0 | 122.0 | 220.0 |

| **Chi-Square Tests** | | | | | |
| --- | --- | --- | --- | --- | --- |
|  | Value | df | Asymptotic Significance (2-sided) | Exact Sig. (2-sided) | Exact Sig. (1-sided) |
| Pearson Chi-Square | 1.510a | 1 | .219 |  |  |
| Continuity Correctionb | 1.045 | 1 | .307 |  |  |
| Likelihood Ratio | 1.500 | 1 | .221 |  |  |
| Fisher's Exact Test |  |  |  | .301 | .153 |
| N of Valid Cases | 220 |  |  |  |  |
| a. 0 cells (0.0%) have expected count less than 5. The minimum expected count is 12.03. | | | | | |
| b. Computed only for a 2x2 table | | | | | |

| **Symmetric Measures** | | | |
| --- | --- | --- | --- |
|  | | Value | Approximate Significance |
| Nominal by Nominal | Phi | -.083 | .219 |
| Cramer's V | .083 | .219 |
| N of Valid Cases | | 220 |  |

**E * DM**

| **Crosstab** | | | | | |
| --- | --- | --- | --- | --- | --- |
|  | | | DM | | Total |
| 0 | 1 |
| E | R | Count | 80 | 106 | 186 |
| Expected Count | 82.9 | 103.1 | 186.0 |
| S | Count | 18 | 16 | 34 |
| Expected Count | 15.1 | 18.9 | 34.0 |
| Total | | Count | 98 | 122 | 220 |
| Expected Count | 98.0 | 122.0 | 220.0 |

| **Chi-Square Tests** | | | | | |
| --- | --- | --- | --- | --- | --- |
|  | Value | df | Asymptotic Significance (2-sided) | Exact Sig. (2-sided) | Exact Sig. (1-sided) |
| Pearson Chi-Square | 1.148a | 1 | .284 |  |  |
| Continuity Correctionb | .781 | 1 | .377 |  |  |
| Likelihood Ratio | 1.141 | 1 | .286 |  |  |
| Fisher's Exact Test |  |  |  | .349 | .188 |
| N of Valid Cases | 220 |  |  |  |  |
| a. 0 cells (0.0%) have expected count less than 5. The minimum expected count is 15.15. | | | | | |
| b. Computed only for a 2x2 table | | | | | |

| **Symmetric Measures** | | | |
| --- | --- | --- | --- |
|  | | Value | Approximate Significance |
| Nominal by Nominal | Phi | -.072 | .284 |
| Cramer's V | .072 | .284 |
| N of Valid Cases | | 220 |  |

**TET * DM**

| **Crosstab** | | | | | |
| --- | --- | --- | --- | --- | --- |
|  | | | DM | | Total |
| 0 | 1 |
| TET | R | Count | 31 | 37 | 68 |
| Expected Count | 30.3 | 37.7 | 68.0 |
| S | Count | 67 | 85 | 152 |
| Expected Count | 67.7 | 84.3 | 152.0 |
| Total | | Count | 98 | 122 | 220 |
| Expected Count | 98.0 | 122.0 | 220.0 |

| **Chi-Square Tests** | | | | | |
| --- | --- | --- | --- | --- | --- |
|  | Value | df | Asymptotic Significance (2-sided) | Exact Sig. (2-sided) | Exact Sig. (1-sided) |
| Pearson Chi-Square | .043a | 1 | .835 |  |  |
| Continuity Correctionb | .004 | 1 | .951 |  |  |
| Likelihood Ratio | .043 | 1 | .835 |  |  |
| Fisher's Exact Test |  |  |  | .884 | .475 |
| N of Valid Cases | 220 |  |  |  |  |
| a. 0 cells (0.0%) have expected count less than 5. The minimum expected count is 30.29. | | | | | |
| b. Computed only for a 2x2 table | | | | | |

| **Symmetric Measures** | | | |
| --- | --- | --- | --- |
|  | | Value | Approximate Significance |
| Nominal by Nominal | Phi | .014 | .835 |
| Cramer's V | .014 | .835 |
| N of Valid Cases | | 220 |  |

**CD * DM**

| **Crosstab** | | | | | |
| --- | --- | --- | --- | --- | --- |
|  | | | DM | | Total |
| 0 | 1 |
| CD | R | Count | 13 | 22 | 35 |
| Expected Count | 15.6 | 19.4 | 35.0 |
| S | Count | 85 | 100 | 185 |
| Expected Count | 82.4 | 102.6 | 185.0 |
| Total | | Count | 98 | 122 | 220 |
| Expected Count | 98.0 | 122.0 | 220.0 |

| **Chi-Square Tests** | | | | | |
| --- | --- | --- | --- | --- | --- |
|  | Value | df | Asymptotic Significance (2-sided) | Exact Sig. (2-sided) | Exact Sig. (1-sided) |
| Pearson Chi-Square | .923a | 1 | .337 |  |  |
| Continuity Correctionb | .601 | 1 | .438 |  |  |
| Likelihood Ratio | .935 | 1 | .334 |  |  |
| Fisher's Exact Test |  |  |  | .360 | .220 |
| N of Valid Cases | 220 |  |  |  |  |
| a. 0 cells (0.0%) have expected count less than 5. The minimum expected count is 15.59. | | | | | |
| b. Computed only for a 2x2 table | | | | | |

| **Symmetric Measures** | | | |
| --- | --- | --- | --- |
|  | | Value | Approximate Significance |
| Nominal by Nominal | Phi | -.065 | .337 |
| Cramer's V | .065 | .337 |
| N of Valid Cases | | 220 |  |

**TEI * DM**

| **Crosstab** | | | | | |
| --- | --- | --- | --- | --- | --- |
|  | | | DM | | Total |
| 0 | 1 |
| TEI | S | Count | 98 | 122 | 220 |
| Expected Count | 98.0 | 122.0 | 220.0 |
| Total | | Count | 98 | 122 | 220 |
| Expected Count | 98.0 | 122.0 | 220.0 |

| **Chi-Square Tests** | |
| --- | --- |
|  | Value |
| Pearson Chi-Square | .a |
| N of Valid Cases | 220 |
| a. No statistics are computed because TEI is a constant. | |

| **Symmetric Measures** | | |
| --- | --- | --- |
|  | | Value |
| Nominal by Nominal | Phi | .a |
| N of Valid Cases | | 220 |
| a. No statistics are computed because TEI is a constant. | | |

**LZ * DM**

| **Crosstab** | | | | | |
| --- | --- | --- | --- | --- | --- |
|  | | | DM | | Total |
| 0 | 1 |
| LZ | S | Count | 98 | 122 | 220 |
| Expected Count | 98.0 | 122.0 | 220.0 |
| Total | | Count | 98 | 122 | 220 |
| Expected Count | 98.0 | 122.0 | 220.0 |

| **Chi-Square Tests** | |
| --- | --- |
|  | Value |
| Pearson Chi-Square | .a |
| N of Valid Cases | 220 |
| a. No statistics are computed because LZ is a constant. | |

| **Symmetric Measures** | | |
| --- | --- | --- |
|  | | Value |
| Nominal by Nominal | Phi | .a |
| N of Valid Cases | | 220 |
| a. No statistics are computed because LZ is a constant. | | |

**GEN * DM**

| **Crosstab** | | | | | |
| --- | --- | --- | --- | --- | --- |
|  | | | DM | | Total |
| 0 | 1 |
| GEN | R | Count | 48 | 62 | 110 |
| Expected Count | 49.0 | 61.0 | 110.0 |
| S | Count | 50 | 60 | 110 |
| Expected Count | 49.0 | 61.0 | 110.0 |
| Total | | Count | 98 | 122 | 220 |
| Expected Count | 98.0 | 122.0 | 220.0 |

| **Chi-Square Tests** | | | | | |
| --- | --- | --- | --- | --- | --- |
|  | Value | df | Asymptotic Significance (2-sided) | Exact Sig. (2-sided) | Exact Sig. (1-sided) |
| Pearson Chi-Square | .074a | 1 | .786 |  |  |
| Continuity Correctionb | .018 | 1 | .892 |  |  |
| Likelihood Ratio | .074 | 1 | .786 |  |  |
| Fisher's Exact Test |  |  |  | .892 | .446 |
| N of Valid Cases | 220 |  |  |  |  |
| a. 0 cells (0.0%) have expected count less than 5. The minimum expected count is 49.00. | | | | | |
| b. Computed only for a 2x2 table | | | | | |

| **Symmetric Measures** | | | |
| --- | --- | --- | --- |
|  | | Value | Approximate Significance |
| Nominal by Nominal | Phi | -.018 | .786 |
| Cramer's V | .018 | .786 |
| N of Valid Cases | | 220 |  |

**RIF * DM**

| **Crosstab** | | | | | |
| --- | --- | --- | --- | --- | --- |
|  | | | DM | | Total |
| 0 | 1 |
| RIF | R | Count | 8 | 9 | 17 |
| Expected Count | 7.6 | 9.4 | 17.0 |
| S | Count | 90 | 113 | 203 |
| Expected Count | 90.4 | 112.6 | 203.0 |
| Total | | Count | 98 | 122 | 220 |
| Expected Count | 98.0 | 122.0 | 220.0 |

| **Chi-Square Tests** | | | | | |
| --- | --- | --- | --- | --- | --- |
|  | Value | df | Asymptotic Significance (2-sided) | Exact Sig. (2-sided) | Exact Sig. (1-sided) |
| Pearson Chi-Square | .047a | 1 | .828 |  |  |
| Continuity Correctionb | .000 | 1 | 1.000 |  |  |
| Likelihood Ratio | .047 | 1 | .828 |  |  |
| Fisher's Exact Test |  |  |  | 1.000 | .511 |
| N of Valid Cases | 220 |  |  |  |  |
| a. 0 cells (0.0%) have expected count less than 5. The minimum expected count is 7.57. | | | | | |
| b. Computed only for a 2x2 table | | | | | |

| **Symmetric Measures** | | | |
| --- | --- | --- | --- |
|  | | Value | Approximate Significance |
| Nominal by Nominal | Phi | .015 | .828 |
| Cramer's V | .015 | .828 |
| N of Valid Cases | | 220 |  |

**MSB * DM**

| **Crosstab** | | | | | |
| --- | --- | --- | --- | --- | --- |
|  | | | DM | | Total |
| 0 | 1 |
| MSB | 0 | Count | 57 | 75 | 132 |
| Expected Count | 58.8 | 73.2 | 132.0 |
| 1 | Count | 41 | 47 | 88 |
| Expected Count | 39.2 | 48.8 | 88.0 |
| Total | | Count | 98 | 122 | 220 |
| Expected Count | 98.0 | 122.0 | 220.0 |

| **Chi-Square Tests** | | | | | |
| --- | --- | --- | --- | --- | --- |
|  | Value | df | Asymptotic Significance (2-sided) | Exact Sig. (2-sided) | Exact Sig. (1-sided) |
| Pearson Chi-Square | .248a | 1 | .618 |  |  |
| Continuity Correctionb | .130 | 1 | .719 |  |  |
| Likelihood Ratio | .248 | 1 | .618 |  |  |
| Fisher's Exact Test |  |  |  | .678 | .359 |
| Linear-by-Linear Association | .247 | 1 | .619 |  |  |
| N of Valid Cases | 220 |  |  |  |  |
| a. 0 cells (0.0%) have expected count less than 5. The minimum expected count is 39.20. | | | | | |
| b. Computed only for a 2x2 table | | | | | |

| **Symmetric Measures** | | | |
| --- | --- | --- | --- |
|  | | Value | Approximate Significance |
| Nominal by Nominal | Phi | -.034 | .618 |
| Cramer's V | .034 | .618 |
| N of Valid Cases | | 220 |  |

**CMLSB * DM**

| **Crosstab** | | | | | |
| --- | --- | --- | --- | --- | --- |
|  | | | DM | | Total |
| 0 | 1 |
| CMLSB | 0 | Count | 85 | 100 | 185 |
| Expected Count | 82.4 | 102.6 | 185.0 |
| 1 | Count | 13 | 22 | 35 |
| Expected Count | 15.6 | 19.4 | 35.0 |
| Total | | Count | 98 | 122 | 220 |
| Expected Count | 98.0 | 122.0 | 220.0 |

| **Chi-Square Tests** | | | | | |
| --- | --- | --- | --- | --- | --- |
|  | Value | df | Asymptotic Significance (2-sided) | Exact Sig. (2-sided) | Exact Sig. (1-sided) |
| Pearson Chi-Square | .923a | 1 | .337 |  |  |
| Continuity Correctionb | .601 | 1 | .438 |  |  |
| Likelihood Ratio | .935 | 1 | .334 |  |  |
| Fisher's Exact Test |  |  |  | .360 | .220 |
| Linear-by-Linear Association | .919 | 1 | .338 |  |  |
| N of Valid Cases | 220 |  |  |  |  |
| a. 0 cells (0.0%) have expected count less than 5. The minimum expected count is 15.59. | | | | | |
| b. Computed only for a 2x2 table | | | | | |

| **Symmetric Measures** | | | |
| --- | --- | --- | --- |
|  | | Value | Approximate Significance |
| Nominal by Nominal | Phi | .065 | .337 |
| Cramer's V | .065 | .337 |
| N of Valid Cases | | 220 |  |

**IMLB * DM**

| **Crosstab** | | | | | |
| --- | --- | --- | --- | --- | --- |
|  | | | DM | | Total |
| 0 | 1 |
| IMLB | 0 | Count | 72 | 85 | 157 |
| Expected Count | 69.9 | 87.1 | 157.0 |
| 1 | Count | 26 | 37 | 63 |
| Expected Count | 28.1 | 34.9 | 63.0 |
| Total | | Count | 98 | 122 | 220 |
| Expected Count | 98.0 | 122.0 | 220.0 |

| **Chi-Square Tests** | | | | | |
| --- | --- | --- | --- | --- | --- |
|  | Value | df | Asymptotic Significance (2-sided) | Exact Sig. (2-sided) | Exact Sig. (1-sided) |
| Pearson Chi-Square | .383a | 1 | .536 |  |  |
| Continuity Correctionb | .220 | 1 | .639 |  |  |
| Likelihood Ratio | .385 | 1 | .535 |  |  |
| Fisher's Exact Test |  |  |  | .552 | .320 |
| Linear-by-Linear Association | .382 | 1 | .537 |  |  |
| N of Valid Cases | 220 |  |  |  |  |
| a. 0 cells (0.0%) have expected count less than 5. The minimum expected count is 28.06. | | | | | |
| b. Computed only for a 2x2 table | | | | | |

| **Symmetric Measures** | | | |
| --- | --- | --- | --- |
|  | | Value | Approximate Significance |
| Nominal by Nominal | Phi | .042 | .536 |
| Cramer's V | .042 | .536 |
| N of Valid Cases | | 220 |  |

**PAP-AUC (hVISA) * DM**

| **Crosstab** | | | | | |
| --- | --- | --- | --- | --- | --- |
|  | | | DM | | Total |
| 0 | 1 |
| PAP-AUC | Non hVISA | Count | 95 | 111 | 206 |
| Expected Count | 91.8 | 114.2 | 206.0 |
| hVISA | Count | 3 | 11 | 14 |
| Expected Count | 6.2 | 7.8 | 14.0 |
| Total | | Count | 98 | 122 | 220 |
| Expected Count | 98.0 | 122.0 | 220.0 |

| **Chi-Square Tests** | | | | | |
| --- | --- | --- | --- | --- | --- |
|  | Value | df | Asymptotic Significance (2-sided) | Exact Sig. (2-sided) | Exact Sig. (1-sided) |
| Pearson Chi-Square | 3.234a | 1 | .072 |  |  |
| Continuity Correctionb | 2.312 | 1 | .128 |  |  |
| Likelihood Ratio | 3.480 | 1 | .062 |  |  |
| Fisher's Exact Test |  |  |  | .096 | .061 |
| Linear-by-Linear Association | 3.220 | 1 | .073 |  |  |
| N of Valid Cases | 220 |  |  |  |  |
| a. 0 cells (0.0%) have expected count less than 5. The minimum expected count is 6.24. | | | | | |
| b. Computed only for a 2x2 table | | | | | |

| **Symmetric Measures** | | | |
| --- | --- | --- | --- |
|  | | Value | Approximate Significance |
| Nominal by Nominal | Phi | .121 | .072 |
| Cramer's V | .121 | .072 |
| N of Valid Cases | | 220 |  |
